# Supplementary material for: Genetic diversity, genetic structure and diet of ancient and contemporary red deer (Cervus elaphus L.) from north-eastern France
Source: PubMed Central journal article supplement (PMC5755736; doi:10.1371/journal.pone.0189278), 2018-01-05
Supplement: pone.0189278.s002.pdf [file pone.0189278.s002.pdf]

| Lab. N° | Archaeological site         | Location   | Geom or geology                                  | Chronology                                       | Element    | oib     | d/ocp   | Clade   | Haplotype | % N bone                           | % C coll | % N coll | C/N | $\delta^{13}C$ | $\delta^{15}N$ |
|---------|-----------------------------|------------|--------------------------------------------------|--------------------------------------------------|------------|---------|---------|---------|-----------|------------------------------------|----------|----------|-----|----------------|----------------|
| CER17   | Lufisensment Sainte Odile   | Rothenheim | Lössliche terraces, eastern border of the Vosges | Neolithic (Rubané/IVa, near 5100 BC)             | medullaris | removed | removed | unknown | unknown   | 1,60                               | 15,0     | 4,8      | 3,7 | -23,2          | -4,7           |
| CER18   |                             |            |                                                  |                                                  | medullaris | Yes     | Yes     | A       | AM235     | collagen not extracted, %N too low | 3,3      | -21,8    | 6,5 |                |                |
| CER19   |                             |            |                                                  |                                                  | medullaris | Yes     | Yes     | A       | AM235     | collagen not extracted, %N too low | 3,3      | -21,8    | 6,5 |                |                |
| CER20   |                             |            |                                                  |                                                  | medullaris | Yes     | Yes     | A       | AM6       | collagen not extracted, %N too low | 3,3      | -23,9    | 5,3 |                |                |
| CER21   |                             |            |                                                  |                                                  | medullaris | Yes     | Yes     | A       | AM6       | collagen not extracted, %N too low | 3,3      | -23,9    | 5,3 |                |                |
| CER22   |                             |            |                                                  |                                                  | medullaris | Yes     | Yes     | A       | AM6       | collagen not extracted, %N too low | 3,3      | -23,9    | 5,3 |                |                |
| CER23   |                             |            |                                                  |                                                  | medullaris | Yes     | Yes     | A       | AM6       | collagen not extracted, %N too low | 3,3      | -23,9    | 5,3 |                |                |
| CER24   |                             |            |                                                  |                                                  | medullaris | Yes     | Yes     | A       | AM6       | collagen not extracted, %N too low | 3,3      | -23,9    | 5,3 |                |                |
| CER25   |                             |            |                                                  |                                                  | medullaris | Yes     | Yes     | A       | AM6       | collagen not extracted, %N too low | 3,3      | -23,9    | 5,3 |                |                |
| CER26   |                             |            |                                                  |                                                  | medullaris | Yes     | Yes     | A       | AM6       | collagen not extracted, %N too low | 3,3      | -23,9    | 5,3 |                |                |
| CER27   | In der Klamm - Schwabenfeld | Erlenheim  | Alluvial terraces, Rhine valley                  | Bronze Age (Hallstatt D/La Tène A1, near 475 BC) | medullaris | removed | removed | unknown | unknown   | 1,60                               | 15,0     | 4,8      | 3,7 | -23,2          | -4,7           |
| CER28   |                             |            |                                                  |                                                  | medullaris | Yes     | Yes     | A       | AM235     | collagen not extracted, %N too low | 3,3      | -21,7    | 6,5 |                |                |
| CER29   |                             |            |                                                  |                                                  | medullaris | Yes     | Yes     | A       | AM235     | collagen not extracted, %N too low | 3,3      | -21,0    | 5,2 |                |                |
| CER30   |                             |            |                                                  |                                                  | medullaris | Yes     | Yes     | A       | AM235     | collagen not extracted, %N too low | 3,3      | -21,0    | 5,2 |                |                |
| CER31   |                             |            |                                                  |                                                  | medullaris | Yes     | Yes     | A       | AM235     | collagen not extracted, %N too low | 3,3      | -21,3    | 5,1 |                |                |
| CER32   |                             |            |                                                  |                                                  | medullaris | Yes     | Yes     | A       | AM235     | collagen not extracted, %N too low | 3,3      | -21,9    | 6,7 |                |                |
| CER33   |                             |            |                                                  |                                                  | medullaris | Yes     | Yes     | A       | AM235     | collagen not extracted, %N too low | 3,3      | -22,6    | 7,4 |                |                |
| CER34   |                             |            |                                                  |                                                  | medullaris | Yes     | Yes     | A       | AM6       | collagen not extracted, %N too low | 3,3      | -22,4    | 5,4 |                |                |
| CER35   |                             |            |                                                  |                                                  | medullaris | Yes     | Yes     | A       | AM235     | collagen not extracted, %N too low | 3,3      | -22,4    | 5,4 |                |                |
| CER36   |                             |            |                                                  |                                                  | medullaris | Yes     | Yes     | A       | AM235     | collagen not extracted, %N too low | 3,3      | -22,4    | 5,4 |                |                |
| CER37   | Hilfsplatz 2007             | Madenheim  | Hill, eastern border of the Vosges               | Early Middle Age (600-650 A.D)                   | medullaris | removed | removed | unknown | unknown   | 1,60                               | 15,0     | 4,8      | 3,7 | -23,2          | -4,7           |
| CER38   |                             |            |                                                  |                                                  | medullaris | Yes     | Yes     | A       | AM235     | collagen not extracted, %N too low | 3,3      | -21,8    | 6,5 |                |                |
| CER39   |                             |            |                                                  |                                                  | medullaris | Yes     | Yes     | A       | AM235     | collagen not extracted, %N too low | 3,3      | -21,8    | 6,5 |                |                |
| CER40   |                             |            |                                                  |                                                  | medullaris | Yes     | Yes     | A       | AM235     | collagen not extracted, %N too low | 3,3      | -21,8    | 6,5 |                |                |
| CER41   |                             |            |                                                  |                                                  | medullaris | Yes     | Yes     | A       | AM235     | collagen not extracted, %N too low | 3,3      | -21,8    | 6,5 |                |                |
| CER42   |                             |            |                                                  |                                                  | medullaris | Yes     | Yes     | A       | AM235     | collagen not extracted, %N too low | 3,3      | -21,8    | 6,5 |                |                |
| CER43   |                             |            |                                                  |                                                  | medullaris | Yes     | Yes     | A       | AM235     | collagen not extracted, %N too low | 3,3      | -21,8    | 6,5 |                |                |
| CER44   |                             |            |                                                  |                                                  | medullaris | Yes     | Yes     | A       | AM235     | collagen not extracted, %N too low | 3,3      | -21,8    | 6,5 |                |                |
| CER45   |                             |            |                                                  |                                                  | medullaris | Yes     | Yes     | A       | AM235     | collagen not extracted, %N too low | 3,3      | -21,8    | 6,5 |                |                |
| CER46   |                             |            |                                                  |                                                  | medullaris | Yes     | Yes     | A       | AM235     | collagen not extracted, %N too low | 3,3      | -21,8    | 6,5 |                |                |
| CER47   | Bügelgarten                 | Ostheim    | Alluvial cone, eastern border of the Vosges      | Early Middle Age (650-750 A.D)                   | medullaris | removed | removed | unknown | unknown   | 1,60                               | 15,0     | 4,8      | 3,7 | -23,2          | -4,7           |
| CER48   |                             |            |                                                  |                                                  | medullaris | Yes     | Yes     | A       | AM235     | collagen not extracted, %N too low | 3,3      | -21,7    | 6,5 |                |                |
| CER49   |                             |            |                                                  |                                                  | medullaris | Yes     | Yes     | A       | AM235     | collagen not extracted, %N too low | 3,3      | -21,0    | 5,2 |                |                |
| CER50   |                             |            |                                                  |                                                  | medullaris | Yes     | Yes     | A       | AM235     | collagen not extracted, %N too low | 3,3      | -21,0    | 5,2 |                |                |
| CER51   |                             |            |                                                  |                                                  | medullaris | Yes     | Yes     | A       | AM235     | collagen not extracted, %N too low | 3,3      | -21,3    | 5,1 |                |                |
| CER52   |                             |            |                                                  |                                                  | medullaris | Yes     | Yes     | A       | AM235     | collagen not extracted, %N too low | 3,3      | -21,9    | 6,7 |                |                |
| CER53   |                             |            |                                                  |                                                  | medullaris | Yes     | Yes     | A       | AM235     | collagen not extracted, %N too low | 3,3      | -22,6    | 7,4 |                |                |
| CER54   |                             |            |                                                  |                                                  | medullaris | Yes     | Yes     | A       | AM6       | collagen not extracted, %N too low | 3,3      | -22,4    | 5,4 |                |                |
| CER55   |                             |            |                                                  |                                                  | medullaris | Yes     | Yes     | A       | AM235     | collagen not extracted, %N too low | 3,3      | -22,4    | 5,4 |                |                |
| CER56   |                             |            |                                                  |                                                  | medullaris | Yes     | Yes     | A       | AM235     | collagen not extracted, %N too low | 3,3      | -22,4    | 5,4 |                |                |
