# Supplementary material for: Genetic diversity, genetic structure and diet of ancient and contemporary red deer (Cervus elaphus L.) from north-eastern France
Source: PubMed Central journal article supplement (PMC5755736; doi:10.1371/journal.pone.0189278), 2018-01-05
Supplement: pone.0189278.s003.pdf [file pone.0189278.s003.pdf]

| Location and haplotypes of modern red deer analyzed in this study |                                     |                          |                           |             |                         | Haplo-type | Haplo-type | composed haplotype | nAme of composed haplotype |            |
|-------------------------------------------------------------------|-------------------------------------|--------------------------|---------------------------|-------------|-------------------------|------------|------------|--------------------|----------------------------|------------|
| Sample                                                            | Location                            | Geographic unity         | Commune                   | Department  | Sex                     | cyt b      | d-loop     | cyt b/d-loop       | cyt b/d-loop               |            |
| DEER 096                                                          | Cornimont                           | "Cornim"                 | Cornimont                 | Vosges (88) | NO DATA                 | AVc3       | AVd3       | AVc3/AVd3          | AM3                        |            |
| DEER 097                                                          | Cornimont                           | "Cornim"                 | Cornimont                 |             | NO DATA                 | AVc3       | AVd3       | AVc3/AVd3          | AM3                        |            |
| DEER 098                                                          | Cornimont                           | "Cornim"                 | Cornimont                 |             | NO DATA                 | AVc3       | AVd3       | AVc3/AVd3          | AM3                        |            |
| DEER 107                                                          | Cornimont                           | "Cornim"                 | Cornimont                 |             | NO DATA                 | AVc3       | unknown    | AVc3/unknown       | likely AM3                 |            |
| DEER 109                                                          | Cornimont                           | "Cornim"                 | Cornimont                 |             | NO DATA                 | AVc3       | unknown    | AVc3/unknown       | likely AM3                 |            |
| DEER 110                                                          | Cornimont                           | "Cornim"                 | Cornimont                 |             | NO DATA                 | AVc3       | AVd3       | AVc3/AVd3          | AM3                        |            |
| DEER 111                                                          | Cornimont                           | "Cornim"                 | Cornimont                 |             | NO DATA                 | AVc2       | AVd4       | AVc2/AVd4          | AM5                        |            |
| DEER 112                                                          | Cornimont                           | "Cornim"                 | Cornimont                 |             | NO DATA                 | AVc3       | AVd3       | AVc3/AVd3          | AM3                        |            |
| DEER 113                                                          | Cornimont                           | "Cornim"                 | Cornimont                 |             | NO DATA                 | AVc3       | AVd3       | AVc3/AVd3          | AM3                        |            |
| DEER 115                                                          | Cornimont                           | "Cornim"                 | Cornimont                 |             | NO DATA                 | AVc3       | AVd3       | AVc3/AVd3          | AM3                        |            |
| DEER 108                                                          | Cornimont                           | "Cornim"                 | Cornimont                 |             | FEMALE                  | AVc3       | AVd3       | AVc3/AVd3          | AM3                        |            |
| DEER 094                                                          | Cornimont                           | "CornimNA"               | Cornimont                 |             | NO DATA                 | AVc3       | AVd3       | AVc3/AVd3          | AM3                        |            |
| DEER 095                                                          | Cornimont                           | "CornimNA"               | Cornimont                 |             | NO DATA                 | AVc3       | AVd3       | AVc3/AVd3          | AM3                        |            |
| DEER 100                                                          | Cornimont                           | "CornimNA"               | Cornimont                 |             | NO DATA                 | AVc2       | AVd2       | AVc2/AVd2          | AM2                        |            |
| DEER 101                                                          | Cornimont                           | "CornimNA"               | Cornimont                 |             | NO DATA                 | AVc2       | unknown    | AVc2/unknown       | likely AM2                 |            |
| DEER 102                                                          | Cornimont                           | "CornimNA"               | Cornimont                 |             | NO DATA                 | AVc3       | AVd3       | AVc3/AVd3          | AM3                        |            |
| DEER 103                                                          | Cornimont                           | "CornimNA"               | Cornimont                 |             | NO DATA                 | AVc2       | AVd2       | AVc2/AVd2          | AM2                        |            |
| DEER 104                                                          | Cornimont                           | "CornimNA"               | Cornimont                 |             | NO DATA                 | AVc2       | unknown    | AVc2/unknown       | likely AM2                 |            |
| DEER 105                                                          | Cornimont                           | "CornimNA"               | Cornimont                 |             | NO DATA                 | AVc2       | AVd2       | AVc2/AVd2          | AM2                        |            |
| DEER 106                                                          | Cornimont                           | "CornimNA"               | Cornimont                 |             | NO DATA                 | AVc3       | AVd3       | AVc3/AVd3          | AM3                        |            |
| DEER 114                                                          | Cornimont                           | "CornimNA"               | Cornimont                 |             | NO DATA                 | AVc3       | AVd3       | AVc3/AVd3          | AM3                        |            |
| DEER 099                                                          | Cornimont                           | "CornimNA" <sup>tz</sup> | Cornimont                 |             | NO DATA                 | AVc2       | AVd2       | AVc2/AVd2          | AM2                        |            |
| DEER 064                                                          | Massif 25: Femonville               | "Donon Massif"           | Frémonville               |             | Meurthe-et-Moselle (54) | MALE       | AVc3       | AVd3               | AVc3/AVd3                  | AM3        |
| DEER 041                                                          | Massif 26: Domevre sur Vezouze      | "Donon Massif"           | Domevre-sur-Vezouze       |             |                         | FEMALE     | AVc3       | AVd3               | AVc3/AVd3                  | AM3        |
| DEER 044                                                          | Massif 26: Domevre sur Vezouze      | "Donon Massif"           | Domèvre-sur-Vezouze       |             |                         | FEMALE     | AVc3       | AVd3               | AVc3/AVd3                  | AM3        |
| DEER 060                                                          | Massif 26: Herbeville               | "Donon Massif"           | Herbéviller               |             |                         | FEMALE     | AVc3       | AVd3               | AVc3/AVd3                  | AM3        |
| DEER 066                                                          | Massif 26: Neuville les badonviller | "Donon Massif"           | Neuviller-lès-Badonviller |             |                         | MALE       | AVc3       | AVd3               | AVc3/AVd3                  | AM3        |
| DEER 031                                                          | Massif 27: Val-et-Chatillon         | "Donon Massif"           | Val-et-Châtillon          |             |                         | FEMALE     | AVc3       | unknown            | AVc3/unknown               | likely AM3 |
| DEER 034                                                          | Massif 27: Val- et- Chatillon       | "Donon Massif"           | Val-et-Châtillon          |             |                         | FEMALE     | AVc3       | AVd3               | AVc3/AVd3                  | AM3        |
| DEER 042                                                          | Massif 27: Cirey sur Vezouze        | "Donon Massif"           | Cirey-sur-Vezouze         | MALE        |                         | AVc3       | AVd3       | AVc3/AVd3          | AM3                        |            |
| DEER 045                                                          | Massif 27: Val- et- Chatillon       | "Donon Massif"           | Val-et-Châtillon          | MALE        |                         | AVc3       | AVd3       | AVc3/AVd3          | AM3                        |            |
| DEER 046                                                          | Massif 27: Cirey sur Vezouze        | "Donon Massif"           | Cirey-sur-Vezouze         | FEMALE      |                         | AVc3       | AVd3       | AVc3/AVd3          | AM3                        |            |
| DEER 048                                                          | Massif 27: Cirey sur Vezouze        | "Donon Massif"           | Cirey-sur-Vezouze         | FEMALE      |                         | AVc3       | AVd3       | AVc3/AVd3          | AM3                        |            |
| DEER 049                                                          | Massif 27: Cirey sur Vezouze        | "Donon Massif"           | Cirey-sur-Vezouze         | MALE        |                         | AVc3       | AVd3       | AVc3/AVd3          | AM3                        |            |
| DEER 051                                                          | Massif 27: Val-et-Chatillon         | "Donon Massif"           | Val-et-Châtillon          | FEMALE      |                         | AVc3       | AVd3       | AVc3/AVd3          | AM3                        |            |
| DEER 052                                                          | Massif 27: Val-et-Chatillon         | "Donon Massif"           | Val-et-Châtillon          | MALE        |                         | unknown3   | AVd3       | unknown/AVd3       | likely AM3                 |            |

| Sample   | Location                             | Geographic unity         | Commune           | Department              | Sex         | cyt b   | d-loop  | cyt b/d-loop | cyt b/d-loop |     |
|----------|--------------------------------------|--------------------------|-------------------|-------------------------|-------------|---------|---------|--------------|--------------|-----|
| DEER 054 | Massif 27: Val-et-Chatillon          | "Donon Massif"           | Val-et-Châtillon  | Meurthe-et-Moselle (54) | FEMALE      | AVc3    | AVd3    | AVc3/AVd3    | AM3          |     |
| DEER 056 | Massif 27: Cirey sur Vezouze         | "Donon Massif"           | Cirey-sur-Vezouze |                         | MALE        | AVc3    | AVd3    | AVc3/AVd3    | AM3          |     |
| DEER 057 | Massif 27: Val-et-Chatillon          | "Donon Massif"           | Val-et-Châtillon  |                         | FEMALE      | AVc3    | AVd3    | AVc3/AVd3    | AM3          |     |
| DEER 061 | Massif 27: Val-et-Chatillon          | "Donon Massif"           | Val-et-Châtillon  |                         | MALE        | AVc3    | AVd3    | AVc3/AVd3    | AM3          |     |
| DEER 062 | Massif 27: Val-et-Chatillon          | "Donon Massif"           | Val-et-Châtillon  |                         | MALE        | AVc3    | AVd3    | AVc3/AVd3    | AM3          |     |
| DEER 063 | Massif 27: Cirey sur Vezouze         | "Donon Massif"           | Cirey-sur-Vezouze |                         | NO DATA     | unknown | AVd3    | unknown/AVd3 | likely AM3   |     |
| DEER 065 | Massif 27: Val-et-Chatillon          | "Donon Massif"           | Val-et-Châtillon  |                         | MALE        | AVc3    | AVd3    | AVc3/AVd3    | AM3          |     |
| DEER 069 | Massif 27: Val-et-Chatillon          | "Donon Massif"           | Val-et-Châtillon  |                         | MALE        | AVc3    | AVd3    | AVc3/AVd3    | AM3          |     |
| DEER 035 | Massif 28: Sainte Pole               | "Donon Massif"           | Sainte-Pôle       |                         | MALE        | AVc3    | AVd3    | AVc3/AVd3    | AM3          |     |
| DEER 038 | Massif 30: Brouville                 | "Donon Massif"           | Brouville         |                         | MALE        | AVc3    | AVd3    | AVc3/AVd3    | AM3          |     |
| DEER 039 | Massif 30: Orgeval                   | "Donon Massif"           | Ogéville          |                         | MALE        | AVc3    | AVd3    | AVc3/AVd3    | AM3          |     |
| DEER 068 | Massif 30: Hablainville              | Between Donon and Parroy | Hablainville      |                         | NO DATA     | AVc2    | AVd2    | AVc2/AVd2    | AM2          |     |
| DEER 116 | Bresse                               | "La Bresse"              | La Bresse         |                         | Vosges (88) | NO DATA | AVc3    | AVd3         | AVc3/AVd3    | AM3 |
| DEER 117 | Bresse                               | "La Bresse"              | La Bresse         |                         | NO DATA     | AVc3    | AVd3    | AVc3/AVd3    | AM3          |     |
| DEER 070 | La Petite Pierre (Réserve de chasse) | "La Petite Pierre"       | La Petite Pierre  | Bas-Rhin (67)           | NO DATA     | AVc3    | AVd3    | AVc3/AVd3    | AM3          |     |
| DEER 071 | La Petite Pierre (Réserve de chasse) | "La Petite Pierre"       | La Petite Pierre  |                         | FEMALE      | AVc3    | unknown | AVc3/unknown | likely AM3   |     |
| DEER 072 | La Petite Pierre (Réserve de chasse) | "La Petite Pierre"       | La Petite Pierre  |                         | NO DATA     | AVc3    | AVd3    | AVc3/AVd3    | AM3          |     |
| DEER 073 | La Petite Pierre (Réserve de chasse) | "La Petite Pierre"       | La Petite Pierre  |                         | NO DATA     | AVc3    | AVd3    | AVc3/AVd3    | AM3          |     |
| DEER 074 | La Petite Pierre (Réserve de chasse) | "La Petite Pierre"       | La Petite Pierre  |                         | NO DATA     | AVc3    | AVd3    | AVc3/AVd3    | AM3          |     |
| DEER 075 | La Petite Pierre (Réserve de chasse) | "La Petite Pierre"       | La Petite Pierre  |                         | NO DATA     | AVc3    | unknown | AVc3/unknown | likely AM3   |     |
| DEER 076 | La Petite Pierre (Réserve de chasse) | "La Petite Pierre"       | La Petite Pierre  |                         | FEMALE      | unknown | unknown | unknown      | unknown      |     |
| DEER 077 | La Petite Pierre (Réserve de chasse) | "La Petite Pierre"       | La Petite Pierre  |                         | NO DATA     | AVc3    | AVd3    | AVc3/AVd3    | AM3          |     |
| DEER 078 | La Petite Pierre (Réserve de chasse) | "La Petite Pierre"       | La Petite Pierre  |                         | NO DATA     | AVc3    | AVd3    | AVc3/AVd3    | AM3          |     |
| DEER 079 | La Petite Pierre (Réserve de chasse) | "La Petite Pierre"       | La Petite Pierre  |                         | NO DATA     | AVc3    | AVd3    | AVc3/AVd3    | AM3          |     |
| DEER 080 | La Petite Pierre (Réserve de chasse) | "La Petite Pierre"       | La Petite Pierre  |                         | FEMALE      | unknown | unknown | unknown      | unknown      |     |
| DEER 081 | La Petite Pierre (Réserve de chasse) | "La Petite Pierre"       | La Petite Pierre  |                         | NO DATA     | AVc3    | AVd3    | AVc3/AVd3    | AM3          |     |
| DEER 082 | La Petite Pierre (Réserve de chasse) | "La Petite Pierre"       | La Petite Pierre  |                         | NO DATA     | AVc3    | AVd3    | AVc3/AVd3    | AM3          |     |
| DEER 083 | La Petite Pierre (Réserve de chasse) | "La Petite Pierre"       | La Petite Pierre  |                         | NO DATA     | unknown | AVd3    | unknown/AVd3 | likely AM3   |     |
| DEER 084 | La Petite Pierre (Réserve de chasse) | "La Petite Pierre"       | La Petite Pierre  |                         | NO DATA     | AVc3    | AVd3    | AVc3/AVd3    | AM3          |     |
| DEER 085 | La Petite Pierre (Réserve de chasse) | "La Petite Pierre"       | La Petite Pierre  |                         | NO DATA     | AVc3    | unknown | AVc3/unknown | likely AM3   |     |
| DEER 086 | La Petite Pierre (Réserve de chasse) | "La Petite Pierre"       | La Petite Pierre  |                         | NO DATA     | AVc3    | unknown | AVc3/?       | likely AM3   |     |
| DEER 087 | La Petite Pierre (Réserve de chasse) | "La Petite Pierre"       | La Petite Pierre  |                         | FEMALE      | AVc3    | AVd3    | AVc3/AVd3    | AM3          |     |
| DEER 088 | La Petite Pierre (Réserve de chasse) | "La Petite Pierre"       | La Petite Pierre  |                         | FEMALE      | AVc3    | AVd3    | AVc3/AVd3    | AM3          |     |
| DEER 089 | La Petite Pierre (Réserve de chasse) | "La Petite Pierre"       | La Petite Pierre  |                         | FEMALE      | AVc3    | AVd3    | AVc3/AVd3    | AM3          |     |
| DEER 090 | La Petite Pierre (Réserve de chasse) | "La Petite Pierre"       | La Petite Pierre  |                         | NO DATA     | AVc3    | unknown | AVc3/unknown | likely AM3   |     |
| DEER 091 | La Petite Pierre (Réserve de chasse) | "La Petite Pierre"       | La Petite Pierre  |                         | FEMALE      | AVc3    | AVd3    | AVc3/AVd3    | AM3          |     |
| DEER 092 | La Petite Pierre (Réserve de chasse) | "La Petite Pierre"       | La Petite Pierre  |                         | NO DATA     | AVc3    | AVd3    | AVc3/AVd3    | AM3          |     |
| DEER 093 | La Petite Pierre (Réserve de chasse) | "La Petite Pierre"       | La Petite Pierre  |                         | NO DATA     | unknown | unknown | unknown      | unknown      |     |

| Sample   | Location                         | Geographic unity         | Commune               |                         | Sex         | cyt b   | d-loop  | cyt b/d-loop | cyt b/d-loop |            |
|----------|----------------------------------|--------------------------|-----------------------|-------------------------|-------------|---------|---------|--------------|--------------|------------|
| DEER 032 | Massif 24: Embermenil            | "Parroy Massif"          | Embermenil            | Meurthe-et-Moselle (54) | FEMALE      | AVc2    | AVd2    | AVc2/AVd2    | AM2          |            |
| DEER 033 | Massif 24: Laneuveville aux Bois | "Parroy Massif"          | Laneuveville-aux-Bois |                         | FEMALE      | AVc2    | AVd2    | AVc2/AVd2    | AM2          |            |
| DEER 036 | Massif 24: Embermenil            | Between Donon and Parroy | Embermenil            |                         | MALE        | AVc3    | AVd3    | AVc3/AVd3    | AM3          |            |
| DEER 037 | Massif 24: Croismare             | "Parroy Massif"          | Croismare             |                         | FEMALE      | AVc2    | AVd2    | AVc2/AVd2    | AM2          |            |
| DEER 040 | Massif 24: Embermenil            | "Parroy Massif"          | Embermenil            |                         | MALE        | AVc2    | unknown | AVc2/unknown | likely AM2   |            |
| DEER 047 | Massif 24: Laneuveville aux Bois | "Parroy Massif"          | Laneuveville-aux-Bois |                         | MALE        | AVc2    | AVd2    | AVc2/AVd2    | AM2          |            |
| DEER 050 | Massif 24: Embermenil            | "Parroy Massif"          | Embermenil            |                         | FEMALE      | AVc2    | AVd2    | AVc2/AVd2    | AM2          |            |
| DEER 058 | Massif 24: Laneuveville aux Bois | "Parroy Massif"          | Laneuveville-aux-Bois |                         | MALE        | AVc2    | AVd2    | AVc2/AVd2    | AM2          |            |
| DEER 067 | Massif 24: Laneuveville aux Bois | Between Donon and Parroy | Laneuveville-aux-Bois |                         | MALE        | AVc3    | AVd3    | AVc3/AVd3    | AM3          |            |
| DEER 043 | Massif 25: Leintrey              | "Parroy Massif"          | Leintrey              |                         | MALE        | AVc2    | AVd2    | AVc2/AVd2    | AM2          |            |
| DEER 053 | Massif 25: Remoncourt            | Between Donon and Parroy | Remoncourt            |                         | MALE        | AVc3    | AVd3    | AVc3/AVd3    | AM3          |            |
| DEER 055 | Massif 25: Domjevin              | "Parroy Massif"          | Domjevin              |                         | MALE        | unknown | AVd2    | unknown/AVd2 | likely AM2   |            |
| DEER 059 | Massif 25: Leintrey              | "Parroy Massif"          | Leintrey              |                         | FEMALE      | AVc2    | AVd2    | AVc2/AVd2    | AM2          |            |
| DEER 001 | Massif de Rambervillers          | "Rambervillers"          | Rambervillers         |                         | Vosges (88) | NO DATA | AVc1    | AVd1         | AVc1/AVd1    | AM1        |
| DEER 002 | Massif de Rambervillers          | "Rambervillers"          | Rambervillers         |                         |             | NO DATA | unknown | unknown      | unknown      | unknown    |
| DEER 003 | Massif de Rambervillers          | "Rambervillers"          | Rambervillers         |                         |             | NO DATA | AVc1    | AVd1         | AVc1/AVd1    | AM1        |
| DEER 004 | Massif de Rambervillers          | "Rambervillers"          | Rambervillers         |                         |             | NO DATA | AVc1    | AVd1         | AVc1/AVd1    | AM1        |
| DEER 005 | Massif de Rambervillers          | "Rambervillers"          | Rambervillers         |                         |             | NO DATA | AVc1    | unknown      | AVc1/unknown | likely AM1 |
| DEER 006 | Massif de Rambervillers          | "Rambervillers"          | Rambervillers         |                         |             | NO DATA | AVc2    | AVd2         | AVc2/AVd2    | AM2        |
| DEER 007 | Massif de Rambervillers          | "Rambervillers"          | Rambervillers         | NO DATA                 |             | unknown | unknown | unknown      | unknown      |            |
| DEER 008 | Massif de Rambervillers          | "Rambervillers"          | Rambervillers         | NO DATA                 |             | AVc1    | AVd1    | AVc1/AVd1    | AM1          |            |
| DEER 009 | Massif de Rambervillers          | "Rambervillers"          | Rambervillers         | NO DATA                 |             | AVc1    | AVd1    | AVc1/AVd1    | AM1          |            |
| DEER 010 | Massif de Rambervillers          | "Rambervillers"          | Rambervillers         | NO DATA                 |             | AVc1    | AVd1    | AVc1/AVd1    | AM1          |            |
| DEER 011 | Massif de Rambervillers          | "Rambervillers"          | Rambervillers         | NO DATA                 |             | AVc1    | AVd1    | AVc1/AVd1    | AM1          |            |
| DEER 012 | Massif de Rambervillers          | "Rambervillers"          | Rambervillers         | NO DATA                 |             | AVc1    | AVd1    | AVc1/AVd1    | AM1          |            |
| DEER 013 | Massif de Rambervillers          | "Rambervillers"          | Rambervillers         | NO DATA                 |             | AVc1    | AVd1    | AVc1/AVd1    | AM1          |            |
| DEER 014 | Massif de Rambervillers          | "Rambervillers"          | Rambervillers         | NO DATA                 |             | unknown | AVd1    | unknown/AVd1 | likely AM1   |            |
| DEER 015 | Massif de Rambervillers          | "Rambervillers"          | Rambervillers         | NO DATA                 |             | AVc2    | AVd2    | AVc2/AVd2    | AM2          |            |
| DEER 016 | Massif de Rambervillers          | "Rambervillers"          | Rambervillers         | NO DATA                 |             | AVc1    | AVd1    | AVc1/AVd1    | AM1          |            |
| DEER 017 | Massif de Rambervillers          | "Rambervillers"          | Rambervillers         | NO DATA                 |             | AVc1    | AVd1    | AVc1/AVd1    | AM1          |            |
| DEER 018 | Massif de Rambervillers          | "Rambervillers"          | Rambervillers         | NO DATA                 |             | unknown | AVd3    | unknown/AVd3 | likely AM3   |            |
| DEER 019 | Massif de Rambervillers          | "Rambervillers"          | Rambervillers         | NO DATA                 |             | AVc1    | AVd1    | AVc1/AVd1    | AM1          |            |
| DEER 020 | Massif de Rambervillers          | "Rambervillers"          | Rambervillers         | NO DATA                 |             | unknown | unknown | unknown      | unknown      |            |
| DEER 021 | Massif de Rambervillers          | "Rambervillers"          | Rambervillers         | NO DATA                 |             | AVc1    | AVd1    | AVc1/AVd1    | AM1          |            |
| DEER 022 | Massif de Rambervillers          | "Rambervillers"          | Rambervillers         | NO DATA                 |             | AVc3    | AVd3    | AVc3/AVd3    | AM3          |            |
| DEER 023 | Massif de Rambervillers          | "Rambervillers"          | Rambervillers         | NO DATA                 |             | AVc1    | AVd1    | AVc1/AVd1    | AM1          |            |
| DEER 024 | Massif de Rambervillers          | "Rambervillers"          | Rambervillers         | NO DATA                 |             | AVc2    | AVd2    | AVc2/AVd2    | AM2          |            |
| DEER 025 | Massif de Rambervillers          | "Rambervillers"          | Rambervillers         | NO DATA                 |             | AVc2    | AVd1    | AVc2/AVd1    | AM4          |            |
| DEER 026 | Massif de Rambervillers          | "Rambervillers"          | Rambervillers         | NO DATA                 |             | AVc1    | AVd1    | AVc1/AVd1    | AM1          |            |
| DEER 027 | Massif de Rambervillers          | "Rambervillers"          | Rambervillers         | NO DATA                 |             | AVc2    | AVd2    | AVc2/AVd2    | AM2          |            |
| DEER 028 | Massif de Rambervillers          | "Rambervillers"          | Rambervillers         | NO DATA                 |             | AVc1    | AVd1    | AVc1/AVd1    | AM1          |            |
| DEER 029 | Massif de Rambervillers          | "Rambervillers"          | Rambervillers         | NO DATA                 |             | AVc1    | AVd1    | AVc1/AVd1    | AM1          |            |
| DEER 030 | Massif de Rambervillers          | "Rambervillers"          | Rambervillers         | NO DATA                 |             | AVc2    | AVd2    | AVc2/AVd2    | AM2          |            |



comments

genetic sexing: male
