# Supplementary material for: Genetic diversity, genetic structure and diet of ancient and contemporary red deer (Cervus elaphus L.) from north-eastern France
Source: PubMed Central journal article supplement (PMC5755736; doi:10.1371/journal.pone.0189278), 2018-01-05
Supplement: pone.0189278.s004.pdf [file pone.0189278.s004.pdf]

| Ancient Samples   | MJN     | Arlequin |                                   |                                             |
|-------------------|---------|----------|-----------------------------------|---------------------------------------------|
| Species           | Isolate | Isolate  | Genbank accession number for Cytb | Genbank accession number for Control Region |
| <i>C. elaphus</i> | MM007   | MM007    | KF133831                          | KF133903                                    |
| <i>C. elaphus</i> | MM020   | MM020    | KF133832                          | KF133904                                    |
| <i>C. elaphus</i> | MM079   | MM079    | KF133833                          | KF133905                                    |
| <i>C. elaphus</i> | MM080   | MM080    | KF133834                          | KF133906                                    |
| <i>C. elaphus</i> | MM082   | MM082    | KF133835                          | KF133907                                    |
| <i>C. elaphus</i> | MM093   | MM093    | KF133836                          | KF133908                                    |
| <i>C. elaphus</i> | MM095   | MM095    | KF133837                          | KF133909                                    |
| <i>C. elaphus</i> | MM098   | MM098    | KF133838                          | KF133910                                    |
| <i>C. elaphus</i> | MM131   | MM131    | KF133839                          | KF133911                                    |
| <i>C. elaphus</i> | MM135   | MM135    | KF133840                          | KF133912                                    |
| <i>C. elaphus</i> | MM139   | MM139    | KF133841                          | KF133913                                    |
| <i>C. elaphus</i> | MM150   | MM150    | KF133842                          | KF133914                                    |
| <i>C. elaphus</i> | MM153   | MM153    | KF133843                          | KF133915                                    |
| <i>C. elaphus</i> | MM154   | MM154    | KF133844                          | KF133916                                    |
| <i>C. elaphus</i> | MM165   | MM165    | KF133845                          | KF133917                                    |
| <i>C. elaphus</i> | MM175   | MM175    | KF133846                          | KF133918                                    |
| <i>C. elaphus</i> | MM183   | MM183    | KF133847                          | KF133919                                    |
| <i>C. elaphus</i> | MM186   | MM186    | KF133848                          | KF133920                                    |
| <i>C. elaphus</i> | MM187   | MM187    | KF133849                          | KF133921                                    |
| <i>C. elaphus</i> | MM190   | MM190    | KF133850                          | KF133922                                    |
| <i>C. elaphus</i> | MM192   | MM192    | KF133851                          | KF133923                                    |
| <i>C. elaphus</i> | MM198   | MM198    | KF133852                          | KF133924                                    |
| <i>C. elaphus</i> | MM210   | MM210    | KF133853                          | KF133925                                    |
| <i>C. elaphus</i> | MM214   | MM214    | KF133854                          | KF133926                                    |
| <i>C. elaphus</i> | MM224   | MM224    | KF133855                          | KF133927                                    |
| <i>C. elaphus</i> | MM235   | MM235    | KF133856                          | KF133928                                    |
| <i>C. elaphus</i> | MM239   | MM239    | KF133857                          | KF133929                                    |
| <i>C. elaphus</i> | MM245   | MM245    | KF133858                          | KF133930                                    |
| <i>C. elaphus</i> | MM251   | MM251    | KF133859                          | KF133931                                    |
| <i>C. elaphus</i> | MM272   | MM272    | KF133860                          | KF133932                                    |
| <i>C. elaphus</i> | MM352   | MM352    | KF133861                          | KF133933                                    |
| <i>C. elaphus</i> | MM379   | MM379    | KF133862                          | KF133934                                    |
| <i>C. elaphus</i> | MM408   | MM408    | KF133863                          | KF133935                                    |
| <i>C. elaphus</i> | MM455   | MM455    | KF133865                          | KF133937                                    |
| <i>C. elaphus</i> | MM461   | MM461    | KF133866                          | KF133938                                    |
| <i>C. elaphus</i> | MM464   | MM464    | KF133867                          | KF133939                                    |
| <i>C. elaphus</i> | MM468   | MM468    | KF133871                          | KF133943                                    |
| <i>C. elaphus</i> | MM472   | MM472    | KF133868                          | KF133940                                    |
| <i>C. elaphus</i> | MM473   | MM473    | KF133869                          | KF133941                                    |
| <i>C. elaphus</i> | MM475   | MM475    | KF133870                          | KF133942                                    |
| <i>C. elaphus</i> | MM477   | MM477    | KF133872                          | KF133944                                    |
| <i>C. elaphus</i> | MM493   | MM493    | KF133873                          | KF133945                                    |

| <b>Modern Samples</b>    | <b>MJN</b>     | <b>no Arlequin</b> |                                          |                                                    |
|--------------------------|----------------|--------------------|------------------------------------------|----------------------------------------------------|
| <b>Subspecies name</b>   | <b>Isolate</b> | <b>Isolate</b>     | <b>Genbank accession number for Cytb</b> | <b>Genbank accession number for Control Region</b> |
| <i>C. e. hippelaphus</i> | MM335          | MM335              | KF133877                                 | KF133949                                           |
| <i>C. e. hippelaphus</i> | MM702          | MM702              | KF133875                                 | KF133947                                           |
| <i>C. e. maral</i>       | MM331          | MM331              | KF133895                                 | KF133967                                           |
| <i>C. e. hippelaphus</i> | MM719          | MM719              | KF133879                                 | KF133951                                           |
| <i>C. e. hippelaphus</i> | MM781          | MM781              | KF133890                                 | KF133962                                           |
| <i>C. e. hippelaphus</i> | MM754          | MM754              | KF133880                                 | KF133952                                           |
| <i>C. e. scoticus</i>    | D52            | D52                | KF133898                                 | KF133970                                           |
| <i>C. e. atlanticus</i>  | MM762          | MM762              | KF133874                                 | KF133946                                           |
| <i>C. e. atlanticus</i>  | MM765          | MM765              | KF133885                                 | KF133957                                           |
| <i>C. e. hippelaphus</i> | MM337          | MM337              | KF133878                                 | KF133950                                           |
| <i>C. e. maral</i>       | MM315          | MM315              | KF133892                                 | KF133964                                           |
| <i>C. e. maral</i>       | MM313          | MM313              | KF133891                                 | KF133963                                           |
| <i>C. e. scoticus</i>    | MM733          | MM733              | KF133897                                 | KF133969                                           |
| <i>C. e. scoticus</i>    | MM732          | MM732              | KF133896                                 | KF133968                                           |
| <i>C. e. hispanicus</i>  | MM718          | MM718              | KF133888                                 | KF133960                                           |
| <i>C. e. hispanicus</i>  | MM721          | MM721              | KF133886                                 | KF133958                                           |
| <i>C. e. elaphus</i>     | MM770          | MM770              | KF133882                                 | KF133954                                           |
| <i>C. e. maral</i>       | MM766          | MM766              | KF133894                                 | KF133966                                           |
| <i>C. e. bactrianus</i>  | MM300          | MM300              | KF133900                                 | KF133972                                           |
| <i>C. e. nelsoni</i>     | MM722          | MM722              | KF133901                                 | KF133973                                           |
| <i>C. nippon</i>         | MM714          | MM714              | KF133902                                 | KF133974                                           |
